# Supplementary material for: Ivermectin Attenuates CCl4-Induced Liver Fibrosis in Mice by Suppressing Hepatic Stellate Cell Activation
Source: MDPI journal article supplement (doi:10.3390/ijms232416043), 2022-12-16
Supplement: s1 [file s1]

## Supplementary Material

### Supplementary Figure S1

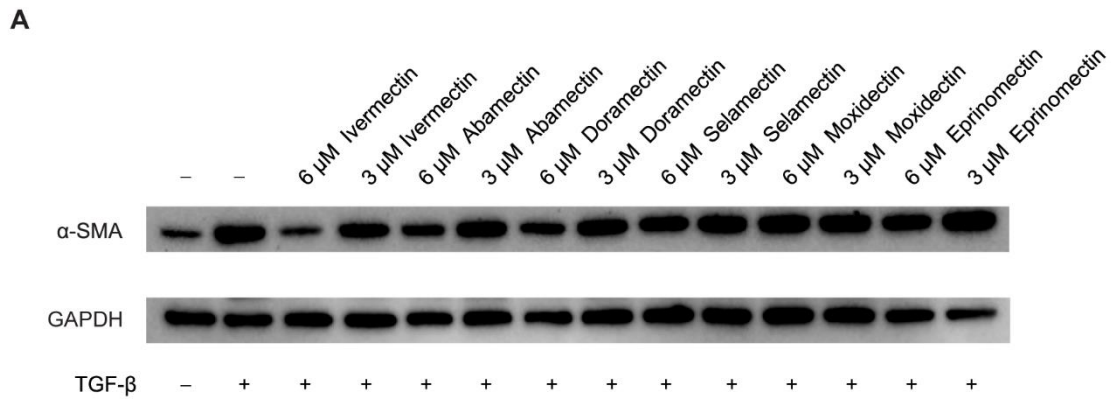

**Figure S1. The protein levels of  $\alpha$ -SMA in CFSC cells after TGF- $\beta$ 1 stimulation and macrocyclic lactones treatment.** Western blot analyzed  $\alpha$ -SMA protein levels in TGF- $\beta$ 1-stimulated CFSC cells treated with different doses (6  $\mu$ M, 3  $\mu$ M) of ivermectin, abamectin, doramectin, selamectin, moxidectin, and eprinomectin.

### Supplementary Figure S2

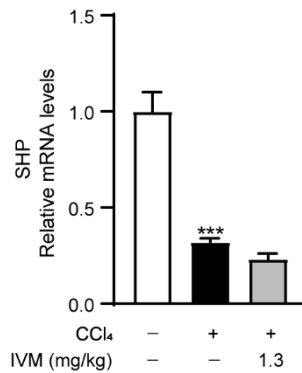

**Figure S2. The mRNA expression of SHP in liver after Ccl4 injection and ivermectin treatment.** Hepatic SHP expression in mice analyzed by Real-time PCR. Data represent the mean  $\pm$  SEM. \*\*\*  $P$  < 0.001 vs vehicle-treated control group.
